# Supplementary material for: Beyond GLP-1: efficacy and safety of dual and triple incretin agonists in personalized type 2 diabetes care—a systematic review and network meta-analysis
Source: Springer Nature journal article supplement (doi:10.1007/s00592-025-02534-y), 2025-06-05
Supplement: MOESM10 [file 592_2025_2534_MOESM10_ESM.pdf]

**Figure S9. Impact of Dosage and Treatment Duration on Weight Change**

| Author (Year)          | NCT         | Intervention                            | Dosage                                                                                                              | Frequency                  | Duration |
|------------------------|-------------|-----------------------------------------|---------------------------------------------------------------------------------------------------------------------|----------------------------|----------|
| Asano M et al. (2022)  | NCT04208620 | Cotadutide (600 µg)                     | Cotadutide was titrated from 50 µg, escalating weekly to 600 µg by Day 36, and maintained at 600 µg until Day 70.   | Once daily                 | 70 days  |
| Asano M et al. (2022)  | NCT04208620 | PLB                                     | Volume-matched placebo following the same dose-escalation schedule as Cotadutide groups                             | Once daily                 | 70 days  |
| Ambery P et al. (2018) | NCT02548585 | Cotadutide 200 µg                       | Up to 200 µg                                                                                                        | Once daily                 | 41 days  |
| Ambery P et al. (2018) |             | PLB                                     | Matched volume                                                                                                      | Once daily                 | 41 days  |
| Blüher M et al. (2023) | NCT04153929 | PLB                                     | Volume- and schedule-matched to active intervention doses (e.g., once or twice weekly)                              | As per active intervention | 16 weeks |
| Blüher M et al. (2023) | NCT04153929 | Semaglutide (1 mg)                      | Initiated at 0.25 mg (Weeks 1–4) → 0.5 mg (Weeks 5–8) → 1.0 mg (Weeks 9–16)                                         | Once weekly                | 16 weeks |
| Blüher M et al. (2023) | NCT04153929 | Survodutide 0.3 mg weekly               | 0.3 mg maintained throughout the study period                                                                       | Once weekly                | 16 weeks |
| Blüher M et al. (2023) | NCT04153929 | Survodutide 0.9 mg weekly               | 0.3 mg (Weeks 1–4) → 0.6 mg (Weeks 5–8) → 0.9 mg (Weeks 9–16)                                                       | Once weekly                | 16 weeks |
| Blüher M et al. (2023) | NCT04153929 | Survodutide 1.2 mg twice weekly (2.4mg) | 0.3 mg (Weeks 1–4) → 0.6 mg (Weeks 5–8) → 1.2 mg (Weeks 9–16)                                                       | Twice weekly               | 16 weeks |
| Blüher M et al. (2023) | NCT04153929 | Survodutide 1.8 mg twice weekly (3.6mg) | 0.3 mg (Weeks 1–4) → 0.6 mg (Weeks 5–8) → 1.2 mg (Weeks 9–10) → 1.8 mg (Weeks 11–16)                                | Twice weekly               | 16 weeks |
| Blüher M et al. (2023) | NCT04153929 | Survodutide 1.8 mg weekly               | 0.3 mg (Weeks 1–4) → 0.6 mg (Weeks 5–8) → 1.2 mg (Weeks 9–12) → 1.8 mg (Weeks 13–16)                                | Once weekly                | 16 weeks |
| Blüher M et al. (2023) | NCT04153929 | Survodutide 2.7 mg weekly               | 0.3 mg (Weeks 1–4) → 0.6 mg (Weeks 5–8) → 1.2 mg (Weeks 9–12) → 2.4 mg (Weeks 13–14) → 2.7 mg (Weeks 15–16)         | Once weekly                | 16 weeks |
| Dahl D et al. (2022)   | NCT04039503 | PLB                                     | Volume-matched to Tirzepatide doses                                                                                 | Once weekly                | 40 weeks |
| Dahl D et al. (2022)   | NCT04039503 | Tirzepatide (10 mg)                     | Starting dose: 2.5 mg (Weeks 1–4) → 5 mg (Weeks 5–8) → Maintained at 10 mg from Week 9 onward                       | Once weekly                | 40 weeks |
| Dahl D et al. (2022)   | NCT04039503 | Tirzepatide (15 mg)                     | Starting dose: 2.5 mg (Weeks 1–4) → 5 mg (Weeks 5–8) → 10 mg (Weeks 9–12) → Maintained at 15 mg from Week 13 onward | Once weekly                | 40 weeks |

|                           |             |                                     |                                                                                                                               |             |             |
|---------------------------|-------------|-------------------------------------|-------------------------------------------------------------------------------------------------------------------------------|-------------|-------------|
| Dahl D et al. (2022)      | NCT04039503 | Tirzepatide (5 mg)                  | Starting dose: 2.5 mg (Weeks 1–4) → Maintained at 5 mg from Week 5 onward                                                     | Once weekly | 40 weeks    |
| Del Prato S et al. (2021) | NCT03730662 | Insulin Glargine (Basaglar)         | Titrated starting at 10 U/day → Adjusted to target fasting glucose <100 mg/dL based on median of three blood glucose readings | Once daily  | 52 weeks    |
| Del Prato S et al. (2021) | NCT03730662 | Tirzepatide (10 mg)                 | Starting dose: 2.5 mg (Weeks 1–4) → 5 mg (Weeks 5–8) → Maintained at 10 mg (Week 9 onward)                                    | Once weekly | 52 weeks    |
| Del Prato S et al. (2021) | NCT03730662 | Tirzepatide (15 mg)                 | Starting dose: 2.5 mg (Weeks 1–4) → 5 mg (Weeks 5–8) → 10 mg (Weeks 9–12) → Maintained at 15 mg (Week 13 onward)              | Once weekly | 52 weeks    |
| Del Prato S et al. (2021) | NCT03730662 | Tirzepatide (5 mg)                  | Starting dose: 2.5 mg (Weeks 1–4) → Maintained at 5 mg (Week 5 onward)                                                        | Once weekly | 52 weeks    |
| Feng P et al. (2023)      | NCT04235959 | PLB                                 | Volume- and frequency-matched placebo to Tirzepatide dosing regimens                                                          | Once weekly | 16–24 weeks |
| Feng P et al. (2023)      | NCT04235959 | Tirzepatide: Cohort 1 (2.5–10.0 mg) | 2.5 mg (Weeks 1–4) → Escalated by 2.5 mg every 4 weeks to 10.0 mg (Week 16)                                                   | Once weekly | 16 weeks    |
| Feng P et al. (2023)      | NCT04235959 | Tirzepatide: Cohort 2 (2.5–15.0 mg) | 2.5 mg (Weeks 1–4) → Escalated by 2.5 mg every 4 weeks to 15.0 mg (Week 24)                                                   | Once weekly | 24 weeks    |
| Frías et al. (2021)       | NCT03987919 | Semaglutide (1 mg)                  | 0.25 mg (Weeks 1–4) → 0.5 mg (Weeks 5–8) → Maintained at 1 mg (Week 9 onward)                                                 | Once weekly | 40 weeks    |
| Frías et al. (2021)       | NCT03987919 | Tirzepatide (10 mg)                 | 2.5 mg (Weeks 1–4) → 5 mg (Weeks 5–8) → Maintained at 10 mg (Week 9 onward)                                                   | Once weekly | 40 weeks    |
| Frías et al. (2021)       | NCT03987919 | Tirzepatide (15 mg)                 | 2.5 mg (Weeks 1–4) → 5 mg (Weeks 5–8) → 10 mg (Weeks 9–12) → Maintained at 15 mg (Week 13 onward)                             | Once weekly | 40 weeks    |
| Frías et al. (2021)       | NCT03987919 | Tirzepatide (5 mg)                  | 2.5 mg (Weeks 1–4) → Maintained at 5 mg (Week 5 onward)                                                                       | Once weekly | 40 weeks    |
| Frias JP et al. (2018)    | NCT03131687 | Dulaglutide (1.5 mg)                | Fixed dose: 1.5 mg                                                                                                            | Once weekly | 26 weeks    |
| Frias JP et al. (2018)    | NCT03131687 | PLB                                 | Volume- and frequency-matched placebo for each active treatment arm                                                           | Once weekly | 26 weeks    |
| Frias JP et al. (2018)    | NCT03131687 | Tirzepatide (1 mg)                  | Fixed dose: 1 mg                                                                                                              | Once weekly | 26 weeks    |
| Frias JP et al. (2018)    | NCT03131687 | Tirzepatide (10 mg)                 | Starting dose: 5 mg (Weeks 1–2) → Escalated to 10 mg (Weeks 3–26)                                                             | Once weekly | 26 weeks    |

|                          |             |                                            |                                                                                                                                         |             |          |
|--------------------------|-------------|--------------------------------------------|-----------------------------------------------------------------------------------------------------------------------------------------|-------------|----------|
| Frias JP et al. (2018)   | NCT03131687 | Tirzepatide (15 mg)                        | Starting dose: 5 mg (Weeks 1–2) → Escalated to 10 mg (Weeks 3–6) → 15 mg (Weeks 7–26)                                                   | Once weekly | 26 weeks |
| Frias JP et al. (2018)   | NCT03131687 | Tirzepatide (5 mg)                         | Fixed dose: 5 mg                                                                                                                        | Once weekly | 26 weeks |
| Frías JP et al. (2020)   | NCT03311724 | PLB                                        | Volume-matched placebo following the same dose schedules as the Tirzepatide groups                                                      | Once weekly | 12 weeks |
| Frías JP et al. (2020)   | NCT03311724 | Tirzepatide 12 mg                          | 4 mg QW (Weeks 0–3) → 8 mg QW (Weeks 4–7) → 12 mg QW (Weeks 8–11)                                                                       | Once weekly | 12 weeks |
| Frías JP et al. (2020)   | NCT03311724 | Tirzepatide 15 mg (Accelerated Escalation) | 2.5 mg (Weeks 0–1) → 5 mg (Weeks 2–3) → 10 mg (Weeks 4–7) → 15 mg (Weeks 8–11)                                                          | Once weekly | 12 weeks |
| Frías JP et al. (2020)   | NCT03311724 | Tirzepatide 15 mg (Gradual Escalation)     | 2.5 mg (Weeks 0–3) → 7.5 mg (Weeks 4–7) → 15 mg (Weeks 8–11)                                                                            | Once weekly | 12 weeks |
| Furihata K et al. (2021) | NCT03322631 | PLB                                        | Volume- and frequency-matched placebo                                                                                                   | Once weekly | 8 weeks  |
| Furihata K et al. (2021) | NCT03322631 | Tirzepatide (10 mg)                        | 2.5 mg (Weeks 1–2) → 5 mg (Weeks 3–4) → 10 mg (Weeks 5–8)                                                                               | Once weekly | 8 weeks  |
| Furihata K et al. (2021) | NCT03322631 | Tirzepatide (15 mg)                        | 5 mg (Weeks 1–2) → 10 mg (Weeks 3–6) → 15 mg (Weeks 7–8)                                                                                | Once weekly | 8 weeks  |
| Furihata K et al. (2021) | NCT03322631 | Tirzepatide (5 mg)                         | Fixed dose: 5 mg (Weeks 1–8)                                                                                                            | Once weekly | 8 weeks  |
| Garvey WT et al. (2023)  | NCT04657003 | PLB                                        | Volume-matched placebo injections to mimic the Tirzepatide dose-escalation schedule                                                     | Once weekly | 72 weeks |
| Garvey WT et al. (2023)  | NCT04657003 | Tirzepatide (10 mg)                        | Starting dose: 2.5 mg (Weeks 1–4) → 5 mg (Weeks 5–8) → 7.5 mg (Weeks 9–12) → Maintained at 10 mg (Week 13 onward)                       | Once weekly | 72 weeks |
| Garvey WT et al. (2023)  | NCT04657003 | Tirzepatide (15 mg)                        | Starting dose: 2.5 mg (Weeks 1–4) → 5 mg (Weeks 5–8) → 7.5 mg (Weeks 9–12) → 10 mg (Weeks 13–16) → Maintained at 15 mg (Week 17 onward) | Once weekly | 72 weeks |
| Golubic R et al. (2023)  | NCT03596177 | Cotadutide (300 µg)                        | Initiated at 100 µg/day (Days 1–4) → 200 µg/day (Days 5–8) → 300 µg/day (Days 9–42)                                                     | Once daily  | Day 59   |
| Golubic R et al. (2023)  | NCT03596177 | PLB                                        | Volume-matched to Cotadutide doses                                                                                                      | Once daily  | Day 59   |
| Jiang H et al. (2022)    | NCT04466904 | Dulaglutide (1.5 mg)                       | Fixed dose: 1.5 mg                                                                                                                      | Once weekly | 12 weeks |

|                          |             |                                                                   |                                                                                                          |             |          |
|--------------------------|-------------|-------------------------------------------------------------------|----------------------------------------------------------------------------------------------------------|-------------|----------|
| Jiang H et al. (2022)    | NCT04466904 | Mazutide (3.0 mg)                                                 | Dose escalation: 1.0 mg (Weeks 1–4) → 2.0 mg (Weeks 5–8) → 3.0 mg (Weeks 9–12)                           | Once weekly | 12 weeks |
| Jiang H et al. (2022)    | NCT04466904 | Mazutide (4.5 mg)                                                 | Dose escalation: 1.5 mg (Weeks 1–4) → 3.0 mg (Weeks 5–8) → 4.5 mg (Weeks 9–12)                           | Once weekly | 12 weeks |
| Jiang H et al. (2022)    | NCT04466904 | Mazutide (6.0 mg)                                                 | Dose escalation: 2.0 mg (Weeks 1–4) → 4.0 mg (Weeks 5–8) → 6.0 mg (Weeks 9–12)                           | Once weekly | 12 weeks |
| Jiang H et al. (2022)    | NCT04466904 | PLB                                                               | Volume-matched placebo following the same dose-escalation schedules as IBI362 groups                     | Once weekly | 12 weeks |
| Ludvik B et al. (2021)   | NCT03882970 | Insulin Degludec                                                  | Initial dose: 10 units/day → Weekly titration to fasting blood glucose target (<90 mg/dL)                | Once weekly | 52 weeks |
| Ludvik B et al. (2021)   | NCT03882970 | Tirzepatide: 10 mg                                                | Starting dose: 2.5 mg (4 weeks) → Escalated to 5 mg (4 weeks) → 10 mg (Week 9 onward)                    | Once weekly | 52 weeks |
| Ludvik B et al. (2021)   | NCT03882970 | Tirzepatide: 15 mg                                                | Starting dose: 2.5 mg (4 weeks) → Escalated to 5 mg (4 weeks) → 10 mg (4 weeks) → 15 mg (Week 13 onward) | Once weekly | 52 weeks |
| Ludvik B et al. (2021)   | NCT03882970 | Tirzepatide: 5 mg                                                 | Starting dose: 2.5 mg (4 weeks) → Escalated to 5 mg (Week 5 onward)                                      | Once weekly | 52 weeks |
| Nahra R et al. (2021)    | NCT03235050 | Cotadutide 100 µg                                                 | 100 µg once daily                                                                                        | Once daily  | 14 weeks |
| Nahra R et al. (2021)    | NCT03235050 | Cotadutide 200 µg                                                 | 100 µg initial dose → Titrated to 200 µg/day                                                             | Once daily  | 14 weeks |
| Nahra R et al. (2021)    | NCT03235050 | Cotadutide 300 µg                                                 | 100 µg initial dose → Titrated to 300 µg/day                                                             | Once daily  | 14 weeks |
| Nahra R et al. (2021)    | NCT03235050 | Liraglutide 1.8 mg                                                | 0.6 mg starting dose, up titrated weekly by 0.6 mg until 1.8 mg/day                                      | Once daily  | 14 weeks |
| Nahra R et al. (2021)    | NCT03235050 | PLB                                                               | Volume- and frequency-matched placebo for Cotadutide dosing                                              | Once daily  | 14 weeks |
| Parker VE et al. (2020)  | NCT03244800 | Cotadutide (Cohort 1 -300 µg maintained for 28 days (Days 22–49)) | 50 µg/day (Days 1–7) → 100 µg/day (Days 8–14) → 200 µg/day (Days 15–21) → 300 µg/day (Days 22–49)        | Once daily  | 49 days  |
| Parker VE et al. (2020)  | NCT03244800 | Cotadutide (Cohort 2 -300 µg maintained for 7 days Days 43–49)    | 50 µg/day (Days 1–14) → 100 µg/day (Days 15–28) → 200 µg/day (Days 29–42) → 300 µg/day (Days 43–49)      | Once daily  | 49 days  |
| Parker VE et al. (2020)  | NCT03244800 | PLB                                                               | Volume-matched placebo following the same dose-escalation schedules as Cotadutide group                  | Once daily  | 49 days  |
| Parker VER et al. (2022) | NCT03550378 | Cotadutide (300 µg)                                               | 50 µg (Days 1–4) → Escalated to 100 µg (Days 5–11) → 200 µg (Days 12–18) → 300 µg (Days 19–32)           | Once daily  | 32 days  |

|                                             |             |                                        |                                                                                                   |              |          |
|---------------------------------------------|-------------|----------------------------------------|---------------------------------------------------------------------------------------------------|--------------|----------|
| Parker VER et al. (2022)                    |             | PLB                                    | Volume- and frequency-matched placebo injections                                                  | Once daily   | 32 days  |
| Rosenstock J et al. (2021)                  | NCT03954834 | PLB                                    | Volume-matched to Tirzepatide doses                                                               | Once weekly  | 40 weeks |
| Rosenstock J et al. (2021)                  | NCT03954834 | Tirzepatide (10 mg)                    | 2.5 mg (Weeks 1–4) → 5 mg (Weeks 5–8) → Maintained at 10 mg (Week 9 onward)                       | Once weekly  | 40 weeks |
| Rosenstock J et al. (2021)                  | NCT03954834 | Tirzepatide (15 mg)                    | 2.5 mg (Weeks 1–4) → 5 mg (Weeks 5–8) → 10 mg (Weeks 9–12) → Maintained at 15 mg (Week 13 onward) | Once weekly  | 40 weeks |
| Rosenstock J et al. (2021)                  | NCT03954834 | Tirzepatide (5 mg)                     | 2.5 mg (Weeks 1–4) → Maintained at 5 mg (Week 5 onward)                                           | Once weekly  | 40 weeks |
| Rosenstock J et al. (2023) - Dulaglutide    | NCT04867785 | Dulaglutide (1.5 mg)                   | Fixed dose: 1.5 mg                                                                                | Once weekly  | 36 weeks |
| Rosenstock J et al. (2023) - Dulaglutide    | NCT04867785 | PLB                                    | Volume-matched placebo following the same dose-escalation schedules as Retatrutide groups         | Once weekly  | 36 weeks |
| Rosenstock J et al. (2023) - Dulaglutide    | NCT04867785 | Retatrutide (0.5 mg)                   | 0.5 mg group: Fixed                                                                               | Once weekly  | 36 weeks |
| Rosenstock J et al. (2023) - Dulaglutide    | NCT04867785 | Retatrutide (12 mg Escalation Group)   | 2 mg (Weeks 1–4) → 4 mg (Weeks 5–8) → 8 mg (Weeks 9–12) → 12 mg (Weeks 13–36)                     | Once weekly  | 36 weeks |
| Rosenstock J et al. (2023) - Dulaglutide    | NCT04867785 | Retatrutide (4 mg Escalation Group)    | 2 mg (Weeks 1–4) → 4 mg (Weeks 5–36)                                                              | Once weekly  | 36 weeks |
| Rosenstock J et al. (2023) - Dulaglutide    | NCT04867785 | Retatrutide (4 mg No Escalation Group) | Fixed dose of 4 mg                                                                                | Once weekly  | 36 weeks |
| Rosenstock J et al. (2023) - Dulaglutide    | NCT04867785 | Retatrutide (8 mg Fast Escalation)     | 4 mg (Weeks 1–4) → 8 mg (Weeks 5–36)                                                              | Once weekly  | 36 weeks |
| Rosenstock J et al. (2023) - Dulaglutide    | NCT04867785 | Retatrutide (8 mg Slow Escalation)     | 2 mg (Weeks 1–4) → 4 mg (Weeks 5–8) → 8 mg (Weeks 9–36)                                           | Once weekly  | 36 weeks |
| Rosenstock J et al. (2023) - Insulin Lispro | NCT04537923 | Insulin Lispro                         | Initial dose: 4 IU before each meal, adjusted based on fasting/pre-prandial glucose levels        | Thrice daily | 52 weeks |
| Rosenstock J et al. (2023) - Insulin Lispro | NCT04537923 | Tirzepatide (10 mg)                    | 2.5 mg (Weeks 1–4) → 5 mg (Weeks 5–8) → Escalated to 10 mg from Week 9 onward                     | Once weekly  | 52 weeks |

|                                             |             |                                  |                                                                                                     |             |          |
|---------------------------------------------|-------------|----------------------------------|-----------------------------------------------------------------------------------------------------|-------------|----------|
| Rosenstock J et al. (2023) - Insulin Lispro | NCT04537923 | Tirzepatide (15 mg)              | 2.5 mg (Weeks 1–4) → 5 mg (Weeks 5–8) → 10 mg (Weeks 9–12) → Escalated to 15 mg from Week 13 onward | Once weekly | 52 weeks |
| Rosenstock J et al. (2023) - Insulin Lispro | NCT04537923 | Tirzepatide (5 mg)               | 2.5 mg (Weeks 1–4) → Maintained at 5 mg from Week 5 onward                                          | Once weekly | 52 weeks |
| Schiavon M et al. (2021)                    | NCT02973321 | Liraglutide (1.80 mg)            | Fixed dose: 1.80 mg/day                                                                             | Once daily  | 26 weeks |
| Schiavon M et al. (2021)                    | NCT02973321 | PLB                              | Volume- and frequency-matched placebo for each active treatment arm                                 | Once daily  | 26 weeks |
| Schiavon M et al. (2021)                    | NCT02973321 | SAR425899 (0.12 mg)              | Fixed dose: 0.12 mg/day                                                                             | Once daily  | 26 weeks |
| Schiavon M et al. (2021)                    | NCT02973321 | SAR425899 (0.16 mg)              | Fixed dose: 0.16 mg/day                                                                             | Once daily  | 26 weeks |
| Schiavon M et al. (2021)                    | NCT02973321 | SAR425899 (0.20 mg)              | Fixed dose: 0.20 mg/day                                                                             | Once daily  | 26 weeks |
| Schmitt C et al. (2017)                     | NCT01789788 | PLB                              | Volume- and frequency-matched placebo for each active treatment arm                                 | Once daily  | 14 days  |
| Schmitt C et al. (2017)                     | NCT01789788 | RG7697 (0.25 mg)                 | Fixed dose: 0.25 mg/day                                                                             | Once daily  | 14 days  |
| Schmitt C et al. (2017)                     | NCT01789788 | RG7697 (0.75 mg)                 | Fixed dose: 0.75 mg/day                                                                             | Once daily  | 14 days  |
| Schmitt C et al. (2017)                     | NCT01789788 | RG7697 (1.1 mg)                  | Fixed dose: 1.1 mg/day                                                                              | Once daily  | 14 days  |
| Schmitt C et al. (2017)                     | NCT01789788 | RG7697 (1.5 mg)                  | Fixed dose: 1.5 mg/day                                                                              | Once daily  | 14 days  |
| Schmitt C et al. (2017)                     | NCT01789788 | RG7697 (2.0 mg)                  | Fixed dose: 2.0 mg/day                                                                              | Once daily  | 14 days  |
| Schmitt C et al. (2017)                     | NCT01789788 | RG7697 (2.5 mg)                  | Fixed dose: 2.5 mg/day                                                                              | Once daily  | 14 days  |
| Tillner J et al. (2018)                     | NCT02411825 | PLB                              | Volume-matched placebo following the same dose-escalation schedules as SAR425899 groups             | Once daily  | 28 days  |
| Tillner J et al. (2018)                     | NCT02411825 | SAR425899 (0.09mg)               | 0.03 mg (Days 1–7) → 0.06 mg (Days 8–14) → 0.09 mg (Days 15–21)                                     | Once daily  | 28 days  |
| Tillner J et al. (2018)                     | NCT02411825 | SAR425899 (0.18mg)               | 0.06 mg (Days 1–7) → 0.12 mg (Days 8–14) → 0.18 mg (Days 15–21)                                     | Once daily  | 28 days  |
| Urva S et al. (2022)                        | NCT04143802 | Dulaglutide (1.5 mg)             | Fixed dose: 1.5 mg                                                                                  | Once weekly | 12 weeks |
| Urva S et al. (2022)                        | NCT04143802 | PLB                              | Volume-matched placebo following the same dose-escalation schedules as Retatrutide groups           | Once weekly | 12 weeks |
| Urva S et al. (2022)                        | NCT04143802 | Retatrutide: 0.5 mg (Fixed Dose) | 0.5 mg weekly for 12 weeks                                                                          | Once weekly | 12 weeks |

|                       |             |                                                |                                                                             |             |          |
|-----------------------|-------------|------------------------------------------------|-----------------------------------------------------------------------------|-------------|----------|
| Urva S et al. (2022)  | NCT04143802 | Retatrutide: 1.5 mg (Fixed Dose)               | 1.5 mg weekly for 12 weeks                                                  | Once weekly | 12 weeks |
| Urva S et al. (2022)  | NCT04143802 | Retatrutide: 3 mg (Fixed Dose)                 | 3 mg weekly for 12 weeks                                                    | Once weekly | 12 weeks |
| Urva S et al. (2022)  | NCT04143802 | Retatrutide: 3/6 mg (Gradual Escalation)       | 3 mg (Weeks 1–4) → 6 mg (Weeks 5–12)                                        | Once weekly | 12 weeks |
| Urva S et al. (2022)  | NCT04143802 | Retatrutide: 3/6/9/12 mg (Extended Escalation) | 3 mg (Weeks 1–2) → 6 mg (Weeks 3–4) → 9 mg (Weeks 5–8) → 12 mg (Weeks 9–12) | Once weekly | 12 weeks |
| Zhang B et al. (2024) | NA          | Dulaglutide (1.5 mg)                           | Fixed dose: 1.5 mg                                                          | Once weekly | 20 weeks |
| Zhang B et al. (2024) | NA          | Mazdutide 3 mg                                 | 1.5 mg (Weeks 1–4) → 3 mg (Weeks 5–20)                                      | Once weekly | 20 weeks |
| Zhang B et al. (2024) | NA          | Mazdutide 4.5 mg                               | 1.5 mg (Weeks 1–4) → 3 mg (Weeks 5–8) → 4.5 mg (Weeks 9–20)                 | Once weekly | 20 weeks |
| Zhang B et al. (2024) | NA          | Mazdutide 6 mg                                 | 2 mg (Weeks 1–4) → 4 mg (Weeks 5–8) → 6 mg (Weeks 9–20)                     | Once weekly | 20 weeks |
| Zhang B et al. (2024) | NA          | PLB                                            | Volume-matched placebo mimicking the Mazdutide dose-escalation schedules    | Once weekly | 20 weeks |
